# Supplementary material
Source: publisher figshare collection journal article supplement (https://gsajournals.figshare.com/articles/dataset/_/7957376)
Supplement: Supplementary file 4 [file 1]

# A

```

gipc1Y    ATGCTCTGCGGTCTGGGAAGAAGGAAGAAGGCGTCCCCCTTGGTGGAGAATGAGGAAGCG 60
gipc1X    ATGCTCTGCGGTCTGGGAAGAAGGAAGAAGGCGTCCCCCTTGGTGGAGAATGAGGAAGCG 60
*****

gipc1Y    GAGCCCATCCGCGGTGGTCTCAACAATGCCGGGTATGGAGGGCTTGGATGGAGGAGTCGCT 120
gipc1X    GAGCCCATCCGCGGTGGTCTCAACAATGCCGGGTATGGAGGGCTTGGATGGAGGAGTCGCT 120
*****

gipc1Y    GGGGAGGCTGCAGGGTCTGACGGTCTTCCTCCCCACCAAACAACATGAGACCCCGGCTG 180
gipc1X    GGGGAGGCTGCAGGGTCTGACGGTCTTCCTCCCCACCAAACAACATGAGACCCCGGCTG 180
*****

gipc1Y    ATTTTCCACACCCAACCTGGCTCACGGCAGCCCCACAGCCGCATTTAGGGCTTTAGCAAT 240
gipc1X    ATTTTCCACACCCAACCTGGCTCACGGCAGCCCCACAGCCGCATTTAGGGCTTTAGCAAT 240
*****

gipc1Y    GTGCGAGAGCTCTATGCCAAAATTGGAGAGGCCTTTGGCATCCCAGCATCTGAGGTTATG 300
gipc1X    GTGCGAGAGCTCTATGCCAAAATTGGAGAGGCCTTTGGCATCCCAGCATCTGAGGTTATG 300
*****

gipc1Y    TTTTGCACGCTGAACACTCACAAGGTGGACATGGATAAACTTTTAGGGGGACAGATTGGG 360
gipc1X    TTTTGCACGCTGAACACTCACAAGGTGGACATGGATAAACTTTTAGGGGGACAGATTGGG 360
*****

gipc1Y    CTGGAGGACTTCATTTTGGCCACATTAAAGGCCAGAAGAAGGAAATAGAAATCTTCAAA 420
gipc1X    CTGGAGGACTTCATTTTGGCCACATTAAAGGCCAGAAGAAGGAAATAGAAATCTTCAAA 420
*****

gipc1Y    GGAGAAGATGCTTTAGGACTGACAATCACCGACAACGGAGCAGGTTATGCTTTCATCAAG 480
gipc1X    GGAGAAGATGCTTTAGGACTGACAATCACCGACAACGGAGCAGGTTATGCTTTCATCAAG 480
*****

gipc1Y    AGGATCCGGGAGGGGAGCATCATCCACCAAAATCCAGGTCATTAACGTTGGTGACATGATC 540
gipc1X    AGGATCCGGGAGGGGAGCATCATCCACCAAAATCCAGGTCATTAACGTTGGTGACATGATC 540
*****

gipc1Y    GAGTCCATTAAACGGCCATCGCCTCATTGGCTGTGCGACTACGAAAGTTGCCAAAATGCTG 600
gipc1X    GAGTCCATTAAACGGCCATCGCCTCATTGGCTGTGCGACTACGAAAGTTGCCAAAATGCTG 600
*****

gipc1Y    AAGGAGCTTTCTAAGGGGAAAATGTTACCATCAAGCTTGTGGAGCCCCCTCAAAGCTTTT 660
gipc1X    AAGGAGCTTTCTAAGGGGAAAATGTTACCATCAAGCTTGTGGAGCCCCCTCAAAGCTTTT 660
*****

gipc1Y    GATATGATTGGTCAGAGGTCGTGAGGCTCCAGGTCGGGCTCAGCGGTCCAGCTCGGGACG 720
gipc1X    GATATGATTGGTCAGAGGTCGTGAGGCTCCAGGTCGGGCTCAGCGGTCCAGCTCGGGACG 720
*****

gipc1Y    GGCAGAGGGACCCCTTCGTCTGCGCTCTAAAGGTCGCGCCACCGTGGAAGAGCTGCCTTCT 780
gipc1X    GGCAGAGGGACCCCTTCGTCTGCGCTCTAAAGGTCGCGCCACCGTGGAAGAGCTGCCTTCT 780
*****

gipc1Y    GCATTTGAGGAAAAAGCGATTGAGAAGGTGGATGATTTGCTAGAGAGCTACATGGGCATC 840
gipc1X    GCATTTGAGGAAAAAGCGATTGAGAAGGTGGATGATTTGCTAGAGAGCTACATGGGCATC 840
*****

gipc1Y    AGAGACAGCGAACTGGCCGCCACTATGGTGGAGCTGGGCAAAGACAAGAAGAACCCAGAC 900
gipc1X    AGAGACAGCGAACTGGCCGCCACTATGGTGGAGCTGGGCAAAGACAAGAAGAACCCAGAC 900
*****

gipc1Y    GAGTTTGCTGAAGCTTTGGATGAGACTCTGGGAGACTTCGCCCTCCCCGACGAGTTTGTT 960
gipc1X    GAGTTTGCTGAAGCTTTGGATGAGACTCTGGGAGACTTCGCCCTCCCCGACGAGTTTGTT 960
*****

gipc1Y    TTCGACGCTCTGGGGCGCCATCGGTGACGCGAAGGTTGGACGTGTGTAA 1008
gipc1X    TTCGACGCTCTGGGGCGCCATCGGTGACGCGAAGGTTGGACGTGTGTAA 1008
*****

```

## B

```

gipc1Y    MPLLGLGRRKKASPLVENEEAEPIRGGLNMPGMEGLDGGVAGEAAGSDGLPPPPNNMRPRL 60
gipc1X    MPLLGLGRRKKASPLVENEEAEPIRGGLNLPGMEGLDGGVAGEAAGSDGLPPPPNNMRPRL 60
          *****:*****

gipc1Y    IFHTQLAHGSPTGRIEGFSNVRELYAKIGEAFGIPASEVMFCTLNTHKVDMDKLLGGQIG 120
gipc1X    IFHTQLAHGSPTGRIEGFSNVRELYAKIGEAFGIPASEVMFCTLNTHKVDMDKLLGGQIG 120
          *****

gipc1Y    LEDFIFAHIKGQKKEIEIFKGEDALGLTITDNGAGYAFIKRIREGSIIHQIQVINVGDMI 180
gipc1X    LEDFIFAHIKGQKKEIEIFKGEDALGLTITDNGAGYAFIKRIREGSIIHQIQVINVGDMI 180
          *****

gipc1Y    ESINGHRLIGCRHYEVAKMLKELSKGKMFTIKLVEPLKAFDMIGQRSSGSRSGSAVQLGT 240
gipc1X    ESINGHRLIGCRHYEVAKMLKELPKGKMFTIKLVEPLKAFDMIGQRSSGSRSGSGVQLGT 240
          *****

gipc1Y    GRGTLRLRSKGLATVDELPSAFEEKAIEKVDDLLESYMGIRDSELAATMVDELGDKKKNPD 300
gipc1X    GRGTLRLRSKGPATVEELPSAFEEKAIEKVDDLLESYMGIRDSELAATMVDELGDKKKNPD 300
          *****

gipc1Y    EFAEALDETLGDFAFPDEFVFDVWGAIGDAKVGRV 335
gipc1X    EFAEALDETLGDFAFPDEFVFDVWGAIGDAKVGRV 335
          *****

```

## C

```

sox9bX    ATGAATCTCCTCGACCCCTTACCTGAAGATGACAGAAGAACAGGAGAAATGTCATTTCAGAC 60
sox9bY    ATGAATCTCCTCGACCCCTTACCTGAAGATGACAGAAGAACAGGAGAAATGTCATTTCAGAC 60
          *****

sox9bX    GCTCCGAGCCCCAGCATGTCTGAAGACTCAGCGGGCTCGCCGTGCCCGTCCGGCTCCGGT 120
sox9bY    GCTCCGAGCCCCAGCATGTCTGAAGACTCAGCGGGCTCGCCGTGCCCGTCCGGCTCCGGT 120
          *****

sox9bX    TCGGACACCGAGAACACCCGGCCGTCCGACAACACCTCCTCAGGGGACCGGACTACAAG 180
sox9bY    TCGGACACCGAGAACACCCGGCCGTCCGACAACACCTCCTCAGGGGACCGGACTACAAG 180
          *****

sox9bX    AAGGAAGGCGAGGAAGAGAAGTTCCCGGTGTGCATCAGAGATGCGGTGTCCAGGTGCTG 240
sox9bY    AAGGAAGGCGAGGAAGAGAAGTTCCCGGTGTGCATCAGAGATGCGGTGTCCAGGTGCTG 240
          *****

sox9bX    AAGGGCTATGACTGGACGCTCGTACCCATGCCGGTGCGCGTCAACGGCTCCAGCAAGAGC 300
sox9bY    AAGGGCTATGACTGGACGCTCGTACCCATGCCGGTGCGCGTCAACGGCTCCAGCAAGAGC 300
          *****

sox9bX    AAACCACACGTTAAGAGACCCATGAACGCCTTCATGGTTTGGGCTCAGGCGGCGCGGAGG 360
sox9bY    AAACCACACGTTAAGAGACCCATGAACGCCTTCATGGTTTGGGCTCAGGCGGCGCGGAGG 360
          *****

sox9bX    AAGCTGGCCGATCAGTATCCGCATCTGCACAACGCAGAACTCAGCAAAACCCTGGGAAAA 420
sox9bY    AAGTTGGCCGATCAGTATCCGCATCTGCACAACGCAGAACTCAGCAAAACCCTGGGAAAA 420
          *** *****

sox9bX    CTTTGGAGGCTTCTCAATGAGGTGGAGAAGCGCCGTTTGTGGAGGAAGCTGAACGCCTG 480
sox9bY    CTTTGGAGGCTTCTCAATGAGGTGGAGAAGCGCCGTTTGTGGAGGAAGCTGAACGCCTG 480
          *****

sox9bX    AGAGTGCAGCACAGAAGGATCACCCGACTACAAATATCAACCGAGGCGGAGGAAATCT 540
sox9bY    AGAGTGCAGCACAGAAGGATCACCCGACTATAAATATCAACCGAGGCGGAGGAAATCT 540
          *****

sox9bX    GTTAAGAATGGGCAAAATGAATCCGAGGATGGCGAACAGACGCACATCTCTCCGAACGCT 600
sox9bY    GTTAAGAATGGGCAAAATGAATCCGAGGATGGCGAACAGACGCACATCTCTCCGAACGCT 600
          *****

```

|        |                                                               |      |
|--------|---------------------------------------------------------------|------|
| sox9bX | ATATTCAAGGCGCTGCAGCAAGCAGACTCTCCTGCGTCCAGCATGGGCGAGGTGCACTCT  | 660  |
| sox9bY | ATATTCAAGGCGCTGCAGCAAGCAGACTCTCCTGCGTCCAGCATGGGCGAGGTGCACTCT  | 660  |
| *****  |                                                               |      |
| sox9bX | CCGGGAGAACATTTCGGTTCAGTCACAGGGACCACCAACACCCCGACAACCCCAAAGACA  | 720  |
| sox9bY | CCGGGAGAACATTTCGGTTCAGTCACAGGGACCACCAACACCCCGACAACCCCAAAGACA  | 720  |
| *****  |                                                               |      |
| sox9bX | GATCTTTCTCCAGCAAAGCTGACCTGAAGCGTGAGGGCCGCCCCATTCAAGAGGGCAGC   | 780  |
| sox9bY | GATCTTTCTCCAGCAAAGCTGACCTGAAGCGTGAGGGCCGCCCCATTCAAGAGGGCAGC   | 780  |
| *****  |                                                               |      |
| sox9bX | AGTCGGCAGCTCAACATAGACTTTGGAGCTGTGGACATTGGTGAGCTTAGCAGCGAAGTC  | 840  |
| sox9bY | AGTCGGCAGCTCAACATAGACTTTGGAGCTGTGGACATTGGTGAGCTTAGCTGCGAAGTC  | 840  |
| *****  |                                                               |      |
| sox9bX | ATCTCCAACATCGGGAGCTTTGATGTTGATGAGTTCGACCAGTACCTGCCACCTCACAGC  | 900  |
| sox9bY | ATCTCCAACATCGGGAGCTTTGATGTTGATGAGTTCGACCAGTACCTGCCACCTCACAGC  | 900  |
| *****  |                                                               |      |
| sox9bX | CACGCTGGGGTTGCTGGTCCAGGCCAGGCTGGCTACACAGGCAGCTACGGTATTAGCACC  | 960  |
| sox9bY | CACGCTGGGGTTGCTGGTCCAGGCCAGGCTGGCTACACAGGCAGCTACGGTATTAGCACC  | 960  |
| *****  |                                                               |      |
| sox9bX | TCCTCAGTCAGTCAGGGAGCCGGTGTGGGAGCTCATGCTTGGATGTCCAAGCAGCAGCAG  | 1020 |
| sox9bY | TCCTCAGTCAGTCAGGGAGCCAGTGTGGGAGCTCATGCTTGGATGTCCAAGCAGCAGCAG  | 1020 |
| *****  |                                                               |      |
| sox9bX | CAGCAGCATACTCTGACCAACCTTGGTGGAGCAGAGAGCAAGGTCAACAGGGCCAGCAG   | 1080 |
| sox9bY | CAGCAGCATACTCTGACCAACCTTGGTGGAGCAGAGAGCAAGGTCAACAGGGCCAGCAG   | 1080 |
| *****  |                                                               |      |
| sox9bX | AGAACCACCCAGATCAAGACGGAGCAGCTCAGCCCAGCCACTACAGTGACCAACAGGGA   | 1140 |
| sox9bY | AGAACCACCCAGATCAAGACGGAGCAGCTCAGCCCAGCCACTACAGTGACCAACAGGGA   | 1140 |
| *****  |                                                               |      |
| sox9bX | TCCCCGCAGCACATCACCTATGGCTCATTCAACCTACAGCACTACAGCCCCTCTTCTTAT  | 1200 |
| sox9bY | TCCCCGCAGCACATCACCTATGGCTCATTCAACTTACAGCACTACAGCCCCTCTTCTTAT  | 1200 |
| *****  |                                                               |      |
| sox9bX | CCGTCCATCACAAGAGCACAATATGACTATTGAGAACCAGAGCAGTGCCAACTCTTAC    | 1260 |
| sox9bY | CCGTCCATCACAAGAGCACAATATGACTATTGAGAACCAGAGCAGTGCCAACTCTTAC    | 1260 |
| *****  |                                                               |      |
| sox9bX | TACAGCCACGCAGCTGGCCAAGGTTCCAGCCTGTACTCCACCTTCAGCTACATGAGCCCC  | 1320 |
| sox9bY | TACAGCCACGCAGCTGGCCAAGGTTCCAGCCTGTACTCCACCTTCAGCTACATGAGCCCC  | 1320 |
| *****  |                                                               |      |
| sox9bX | AGCCAGAGGCCGATGTACACCCCAATAGCCGACAGCACTGGGGTGCCCTCTGTGCCGCAG  | 1380 |
| sox9bY | AGCCAGAGGCCGATGTACACCCCAATAGCCGACAGCACTGGGGTGCCCTCTGTGCCGCAG  | 1380 |
| *****  |                                                               |      |
| sox9bX | ACCCACAGTCCACAGCACTGGGAGCAGCAGCCGATTTACACACAACCTGTCCAGGCCCTGA | 1440 |
| sox9bY | ACCCACAGTCCACAGTACTGGGAGCAGCAGCCGATTTACACACAACCTGTCCAGGCCCTGA | 1440 |
| *****  |                                                               |      |

## D

|        |                                                               |     |
|--------|---------------------------------------------------------------|-----|
| sox9bX | MNLLDPYLKMTTEEQEKCHSDAPSPMSSEDSAGSPCPSGSGSDTENTRPSDNHLLRGPDYK | 60  |
| sox9bY | MNLLDPYLKMTTEEQEKCHSDAPSPMSSEDSAGSPCPSGSGSDTENTRPSDNYLLRGPDYK | 60  |
| *****  |                                                               |     |
| sox9bX | KEGEEEFKFPVCIRDAVSQVLKGYDWTLPMPVRVNGSSKSKPHVKRPMNAFMVWAQAARR  | 120 |
| sox9bY | KEGEEEFKFPVCIRDAVSQVLKGYDWTLPMPVRVNGSSKSKPHVKRPMNAFMVWAQAARR  | 120 |
| *****  |                                                               |     |
| sox9bX | KLADQYPHLHNAELSKTLGKLWRLNNEVEKRPFVEEAERLRVQHKKDHPDYKYQPRRRKS  | 180 |
| sox9bY | KLADQYPHLHNAELSKTLGKLWRLNNEVEKRPFVEEAERLRVQHKKDHPDYKYQPRRRKS  | 180 |
| *****  |                                                               |     |

|        |                                               |                                     |     |
|--------|-----------------------------------------------|-------------------------------------|-----|
| sox9bX | VKNGQNESEDGEQTHISPNAIFKALQQADSPASSMGEVHSPGEHS | GQSQGPPTPPTPKT                      | 240 |
| sox9bY | VKNGQNESEDGEQTHISPNAIFKALQQADSPASSMGEVHSPGEHS | GQSQGPPTPPTPKT                      | 240 |
|        | *****                                         |                                     |     |
| sox9bX | DLSSSKADLKREGRPIQEGSSRQLNIDFGAVDIGELS         | SEVISNIGSFDVDEFDQYLPPHS             | 300 |
| sox9bY | DLSSSKADLKREGRPIQEGSSRQLNIDFGAVDIGELS         | SEVISNIGSFDVDEFDQYLPPHS             | 300 |
|        | *****                                         |                                     |     |
| sox9bX | HAGVAGPAQAGYTGSYGISTSSVSQGA                   | VGAAHAWMSKQQQQHTLT                  | 360 |
| sox9bY | HAGVAGPAQAGYTGSYGISTSSVSQGA                   | VGAAHAWMSKQQQQHTLT                  | 360 |
|        | *****                                         |                                     |     |
| sox9bX | RTTQIKTEQLSPSHYSQQGSPQHI                      | TYGSFNLQHYSPSSYPSITRAQYDYSEHQSSANSY | 420 |
| sox9bY | RTTQIKTEQLSPSHYSQQGSPQHI                      | TYGSFNLQHYSPSSYPSITRAQYDYSEHQSSANSY | 420 |
|        | *****                                         |                                     |     |
| sox9bX | YSHAAGQGSSLYSTFSYMSPSRPMYTP                   | ADSTGVPSVPQTHSPQ                    | 479 |
| sox9bY | YSHAAGQGSSLYSTFSYMSPSRPMYTP                   | ADSTGVPSVPQTHSPQ                    | 479 |
|        | *****                                         |                                     |     |

**Figure S4** Alignments of male *G. holbrooki* *gipc1* and *sox9b* alleles.

Alignment of (A) *gipc1* ORF and (B) predicted protein sequences and (C) *sox9b* ORF and (D) putative protein sequences from the X and Y chromosome. The sequences were aligned with Clustal Omega. (B) Orange, GH1 domain; light blue, PDZ domain; red, GH2 domain. (D) Green, DIM domain; dark blue, HMG domain; brown, K2 domain; violet, TA domain.
