# Supplementary material
Source: publisher figshare collection journal article supplement (https://gsajournals.figshare.com/articles/dataset/_/7957376)
Supplement: Supplementary file 6 [file 1]

**Table S4 Sex chromosome genotypes of F<sub>1</sub> fish (pedigree WLC20074) from a cross between a *G. affinis* female (WLC1313) and a *G. holbrooki* male (WLC2514) determined by PCR with the W-marker *amtW* (Gaf88) (LAMATSCH *et al.* 2015) and the Y-marker *sox9bY*.**

| F <sub>1</sub> ♀ non-melanic |    | F <sub>1</sub> ♂ melanic |    |
|------------------------------|----|--------------------------|----|
| WX                           | 26 | WY                       | 28 |
| ZX                           | 21 | ZY                       | 23 |
| <b>Σ 47</b>                  |    | <b>Σ 51</b>              |    |

Z and X were inferred from the absence of PCR products for the W and Y marker, respectively. Note that WZ correspond to chromosome 1 and XY to chromosome 16.

### Reference

Lamatsch, D. K., S. Adolfsson, A. M. Senior, G. Christiansen, M. Pichler *et al.*, 2015 A transcriptome derived female-specific marker from the invasive Western mosquitofish (*Gambusia affinis*). PLoS One 10: e0118214.
