# Supplementary material
Source: publisher figshare collection journal article supplement (https://gsajournals.figshare.com/articles/dataset/_/7957376)
Supplement: Supplementary file 8 [file 1]

**Table S1 Fish used for pool sequencing.**

| <b>Species</b>            | <b>Number and sex of fish</b> | <b>Population</b>                                  | <b>Notes</b> |
|---------------------------|-------------------------------|----------------------------------------------------|--------------|
| <i>Gambusia affinis</i>   | 31 females                    | WLC1313<br>Pena blanca Lake, Arizona, USA          |              |
|                           | 30 males                      | WLC1313<br>Pena blanca Lake, Arizona, USA          |              |
| <i>Gambusia holbrooki</i> | 13 females                    | WLC2514<br>Florida City, Florida, USA              |              |
|                           | 12 females                    | WLC2105<br>Everglades City, Florida, USA           |              |
|                           | 11 females                    | WLC1475<br>Tamiami trail, Everglades, Florida, USA |              |
|                           | 13 males                      | WLC2514<br>Florida City, Florida, USA              | melanic      |
|                           | 12 males                      | WLC2105<br>Everglades City, Florida, USA           | melanic      |
|                           | 11 males                      | WLC1475<br>Tamiami trail, Everglades, Florida, USA | melanic      |
