# Supplementary material
Source: publisher figshare collection journal article supplement (https://gsajournals.figshare.com/articles/dataset/_/7957376)
Supplement: Supplementary file 9 [file 1]

**Table S5 Offspring of non-melanic females and non-melanic males derived from melanic strains.**

| Parental ♀ wt<br><i>G. holbrooki</i> | Parental ♂ wt<br><i>G. holbrooki</i> | Pedigree # | F <sub>1</sub> ♀<br>wildtype | F <sub>1</sub> ♂<br>wildtype | % male<br>offspring |
|--------------------------------------|--------------------------------------|------------|------------------------------|------------------------------|---------------------|
| WLC2514                              | WLC2514 <sup>#</sup>                 | 5589-2s    | 5                            | 0                            | 0                   |
| WLC4598                              | WLC6475                              | 6565       | 18                           | 0                            | 0                   |
| WLC1475                              | WLC2514                              | 6378s      | 23                           | 0                            | 0                   |
| WLC2514                              | WLC2514                              | 6474s      | 30                           | 0                            | 0                   |
| WLC2514                              | WLC2514 <sup>#</sup>                 | 5589-1s    | 36                           | 0                            | 0                   |
| WLC1475                              | WLC2105                              | 6563s      | 102                          | 0                            | 0                   |
| WLC1475                              | WLC2105                              | 6566s      | 191                          | 0                            | 0                   |
| WLC1475                              | WLC2105                              | 632s       | 130                          | 9                            | 6.5                 |
| WLC2514                              | WLC1475                              | 6448s      | 23                           | 2                            | 11.8                |
| WLC2514                              | WLC2514 <sup>#</sup>                 | 5589-3s    | 69                           | 16                           | 18.8                |
| WLC2514                              | WLC2105                              | 6643s      | 57                           | 14                           | 19.7                |
| WLC2105                              | WLC2105                              | 6469s      | 38                           | 10                           | 20.8                |
| WLC1475                              | WLC2105                              | 6564s      | 11                           | 3                            | 21.4                |
| WLC2105                              | WLC2105                              | 902s       | 153                          | 43                           | 21.9                |
| WLC1253                              | WLC1253                              | 724s       | 17                           | 6                            | 26.1                |
| WLC1253                              | WLC1253                              | 582        | 173                          | 61                           | 26.1                |
| WLC2514                              | WLC5589-3s                           | 5589g      | 148                          | 58                           | 28.2                |
| WLC2105                              | WLC2105                              | 869s       | 107                          | 50                           | 31.8                |
| WLC2105                              | WLC2105                              | 6475s      | 6                            | 4                            | 40                  |
| WLC1253                              | WLC1253                              | 1396s      | 62                           | 43                           | 41                  |
| WLC1253                              | WLC1253                              | 932s       | 76                           | 81                           | 51.6                |
| WLC2105                              | WLC2105                              | 1044s      | 50                           | 75                           | 60                  |
| WLC2105                              | WLC2105                              | 724s       | 66                           | 115                          | 63.5                |
| WLC1253                              | WLC1253                              | 769s       | 10                           | 71                           | 87.7                |
|                                      |                                      | <b>Σ</b>   | <b>1601</b>                  | <b>661</b>                   | <b>29.2</b>         |

<sup>#</sup>Identical male. Wt, non-melanic, wildtype-pigmented fish.
