# Supplementary material
Source: publisher figshare collection journal article supplement (https://gsajournals.figshare.com/articles/dataset/_/7957376)
Supplement: Supplementary file 11 [file 1]

|             |                                                              |     |
|-------------|--------------------------------------------------------------|-----|
| me_Sox9a    | F-----YSPAGAGQGSGLYSTFSYMSSPSQRPMYTPADNAGVPSIPQGSP-QHWEQAP   | 479 |
| Ntil_Sox9a  | TATASSYYSHAGAGQSSGLYSTFSYMSSPTQRPMYTPADNTGVPSIPQNSP-QHWD PAP | 492 |
| plf_Sox9a   | ASYSSHAGAG--AGQGSGLYSTFSYMGSFNQRPMYTPADNAGVPSIPQGSPQQHWEQAP  | 487 |
| gup_Sox9a   | ASYSSHAGAGAGAGQGSGLYSTFSYMGSFNQRPMYTPADNAGVPSIPQGSPQQHWEQAP  | 488 |
| Am_Sox9a    | ASYSSHAGAGAGSGQGSGLYSTFSYMGSFNQRPMYTPADNAGVPSIPQGSPQQHWEQAP  | 488 |
| me_Sox9b    | NSYYSHA-----AGQGSNMYSTFSYMS-PSQRPMYTPADSTGVPSVPTHTSPQHWEQQP  | 468 |
| Ntil_Sox9b  | NSYYSHA-----GGQGSLLYSTFSYMS-PNQRPMYTPADTTGVPSVPTHTSPQHWEQQP  | 476 |
| Ghol_Sox9bX | NSYYSHA-----AGQGSLLYSTFSYMS-PSQRPMYTPADSTGVPSVPTHTSPQHWEQQP  | 471 |
| Ghol_Sox9bY | NSYYSHA-----AGQGSLLYSTFSYMS-PSQRPMYTPADSTGVPSVPTHTSPQHWEQQP  | 471 |
| gup_Sox9b   | NSYYSHA-----AGQGSLLYSTFSYMS-PSQRPMYTPADSTGVPSVPTHTSPQHWEQQP  | 472 |
| plf_Sox9b   | NSYYSHA-----AGQGSLLYSTFSYMS-PSQRPMYTPADSTGVPSVPTHTSPQHWEQQP  | 470 |
| Am_Sox9b    | NSYYSHA-----AGQGSLLYSTFSYMS-PSQRPMYTPADSTGVPSVPTHTSPQHWEQQP  | 471 |
| chick_Sox9  | GSYYSHA-----AGQSGGLYSTFTYMN-PTQRPMYTPADTSGVPSIPQTHSPQHWEQQP  | 486 |
| mouse_Sox9  | GSYYSHA-----AGQSGGLYSTFTYMN-PAQRPMYTPADTSGVPSIPQTHSPQHWEQQP  | 499 |
| human_Sox9  | SSYYSHA-----AGQGTGLYSTFTYMN-PAQRPMYTPADTSGVPSIPQTHSPQHWEQQP  | 501 |

.\*. .:\*\*\*\*:\* \* \*\*\*\*\*.:\*\*\*\*:\* \*:\*: \*

|             |          |     |
|-------------|----------|-----|
| me_Sox9a    | VYTQLTRP | 487 |
| Ntil_Sox9a  | VYTQLTRP | 500 |
| plf_Sox9a   | VYTQLTRP | 495 |
| gup_Sox9a   | VYTQLTRP | 496 |
| Am_Sox9a    | VYTQLTRP | 496 |
| me_Sox9b    | IYTQLSRP | 476 |
| Ntil_Sox9b  | IYTQLSRP | 484 |
| Ghol_Sox9bX | IYTQLSRP | 479 |
| Ghol_Sox9bY | IYTQLSRP | 479 |
| gup_Sox9b   | VYTQLTRP | 480 |
| plf_Sox9b   | IYTQLSRP | 478 |
| Am_Sox9b    | IYTQLSRP | 479 |
| chick_Sox9  | VYTQLTRP | 494 |
| mouse_Sox9  | VYTQLTRP | 507 |
| human_Sox9  | VYTQLTRP | 509 |

:\*\*\*\*:\*\*

**Figure S5** Multiple species alignments of Gipc1 and Sox9 protein sequences.

(A) Gipc1 and (B) Sox9 protein alignment. The yellow shading in (B) highlights Sox9a and the blue one Sox9b sequences. The sequences were aligned with Clustal Omega. Am, Amazon molly; chick, chicken (*Gallus gallus*); Ghol, *Gambusia holbrooki*; gup, guppy; me, medaka; mol, Atlantic molly (*Poecilia mexicana*); Ntil, Nile tilapia; plf, platyfish. GenBank accession numbers: XP\_007572354.1 (Am Gipc1); XP\_007560319.1 (Am Sox9a); XP\_007556425.2 (Am Sox9b); XP\_025001585.1 (chick Gipc1); BAA25296.1 (chick Sox9); XP\_008436174.1 (gu Sox9a); NP\_001284373.1 (gu Sox9b); NP\_005707.1 (human (*Homo sapiens*) Gipc1); CAA86598.1 (human Sox9); XP\_023813268.1 (me Gipc1); AAX62152.1 (me Sox9a); AAX62151.1 (me Sox9b); XP\_014866717.1 (mol Gipc1); NP\_061241.1 (mouse Gipc1); NP\_035578.3 (mouse Sox9); XP\_003442153.1 (Ntil Gipc1); XP\_005448042.1 (Ntil Sox9a); XP\_003450167.1 (Ntil Sox9b); XP\_005801543.1 (plf Gipc1); XP\_005807407.1 (plf Sox9a); XP\_005801494.1 (plf Sox9b). Note that the NCBI databank refers to Sox9b as Sox9 in all of the used sequences except for medaka.
